# Supplementary material
Source: Springer Nature journal article supplement (https://www.springermedizin.de/resource/supplementary/12879_2012_1944_MOESM4_ESM.pdf/9443262)

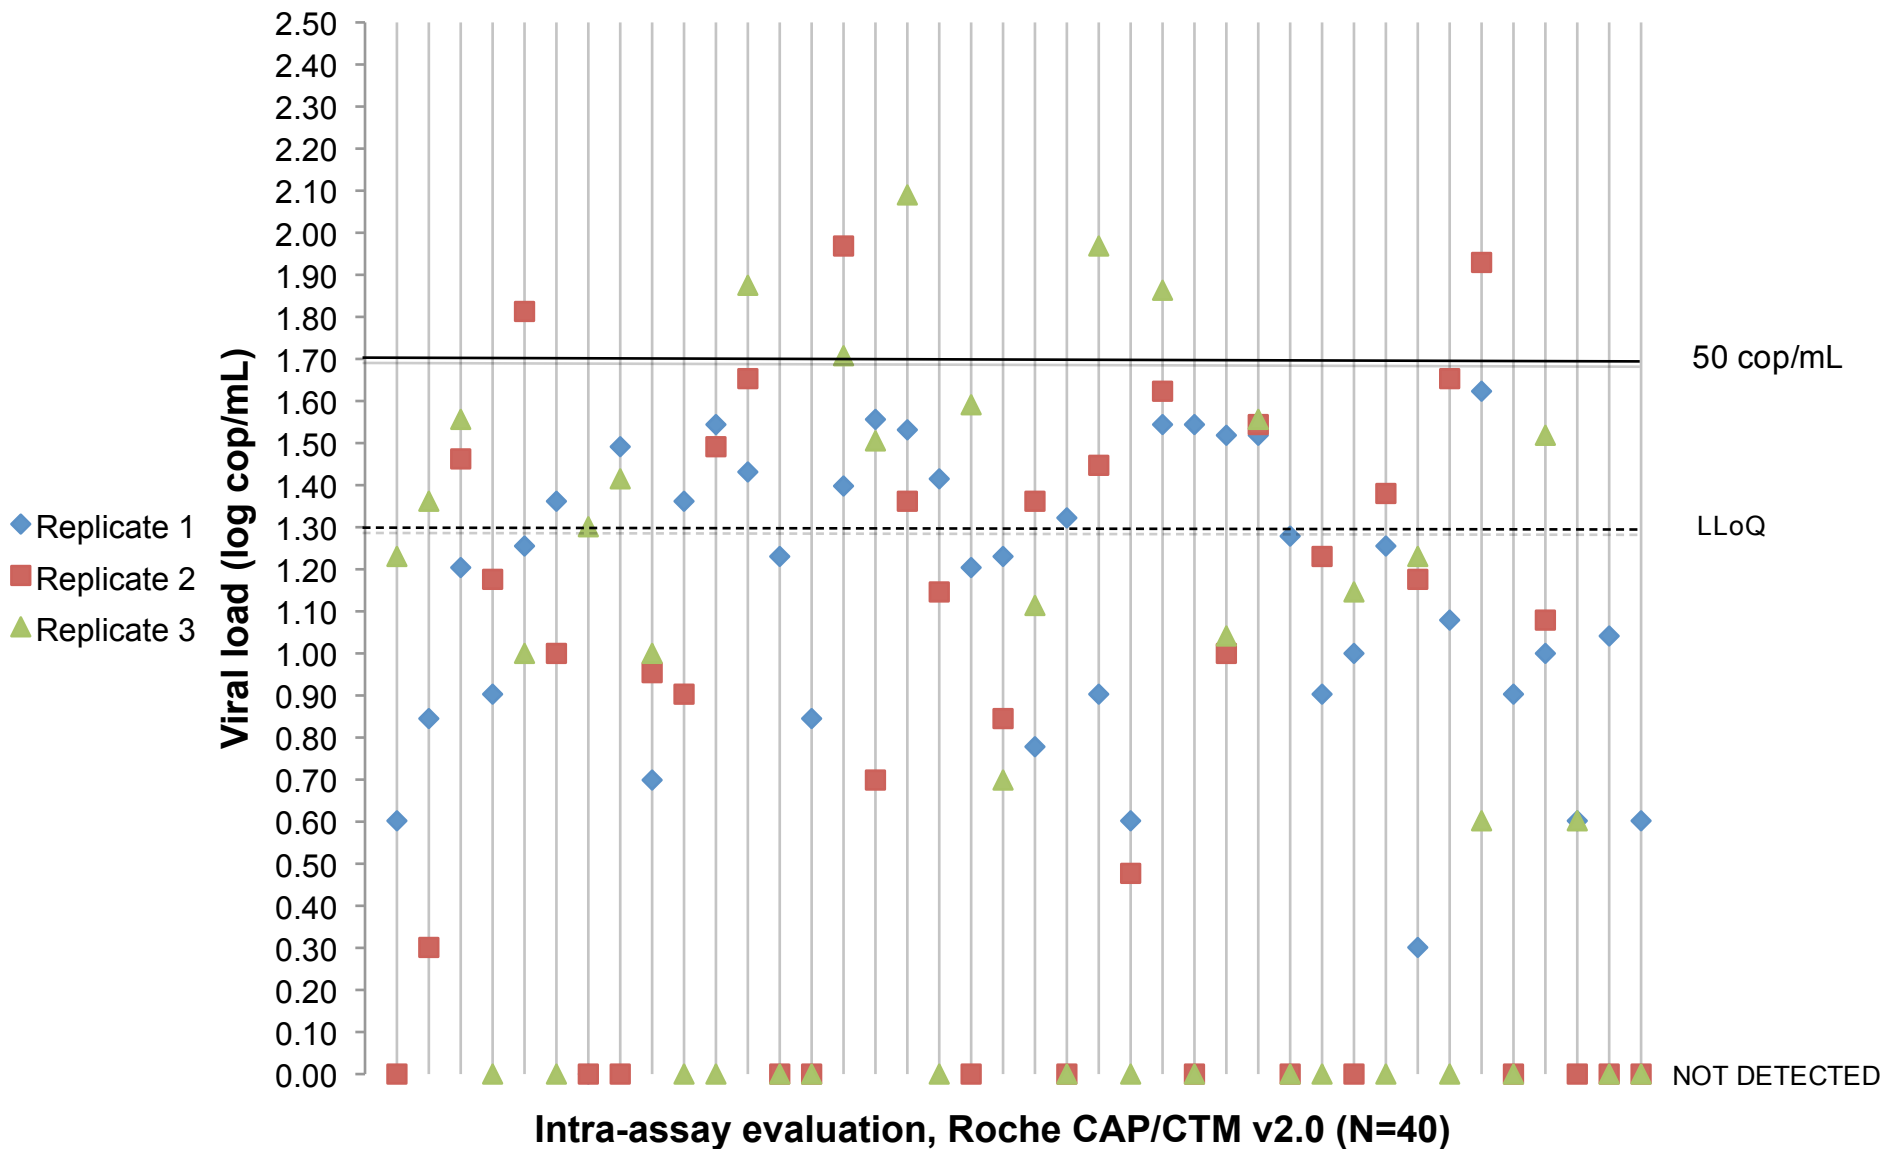

Supplement: MOESM4 [file 9443262]
